# Supplementary material for: Melanoma Cells Can Adopt the Phenotype of Stromal Fibroblasts and Macrophages by Spontaneous Cell Fusion in Vitro
Source: MDPI journal article supplement (doi:10.3390/ijms17060826), 2016-06-02
Supplement: s1 [file s1]

# Supplementary Materials: Melanoma Cells Can Adopt the Phenotype of Stromal Fibroblasts and Macrophages by Spontaneous Cell Fusion *in Vitro*

Lajos V. Kemény, Zsuzsanna Kurgyis, Tünde Buknicz, Gergely Groma, Ádám Jakab, Kurt Zänker, Thomas Dittmar, Lajos Kemény and István B. Németh

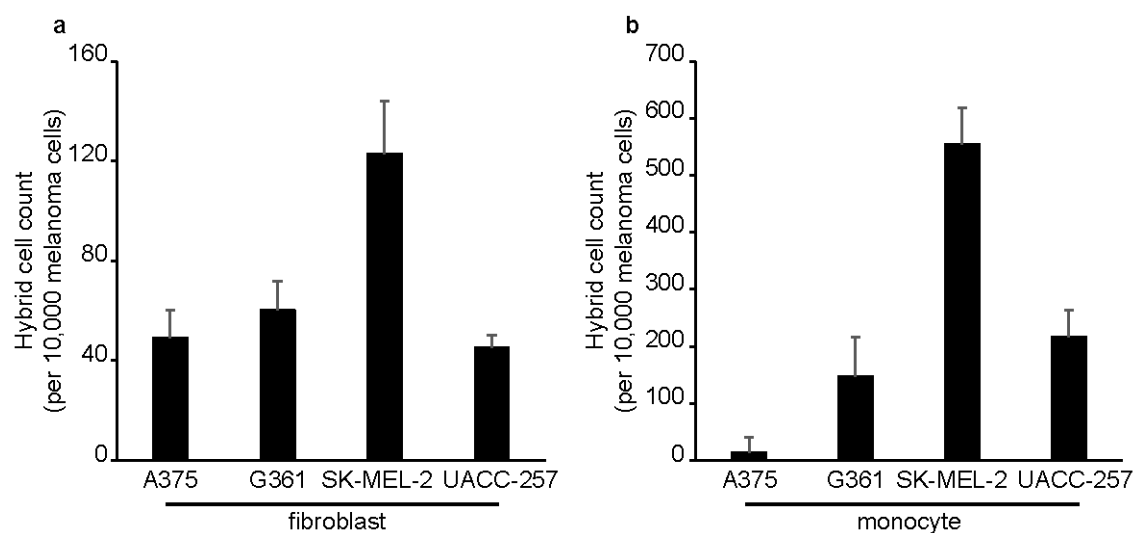

**Figure S1.** Hybrid cell counts in different melanoma cell lines. Melanoma–fibroblast (a) and melanoma–monocyte (b) hybrid cell counts compared to 10,000 melanoma cells after 24 h of co-culture measured with flow cytometry. Means of three experiments + SD are shown.

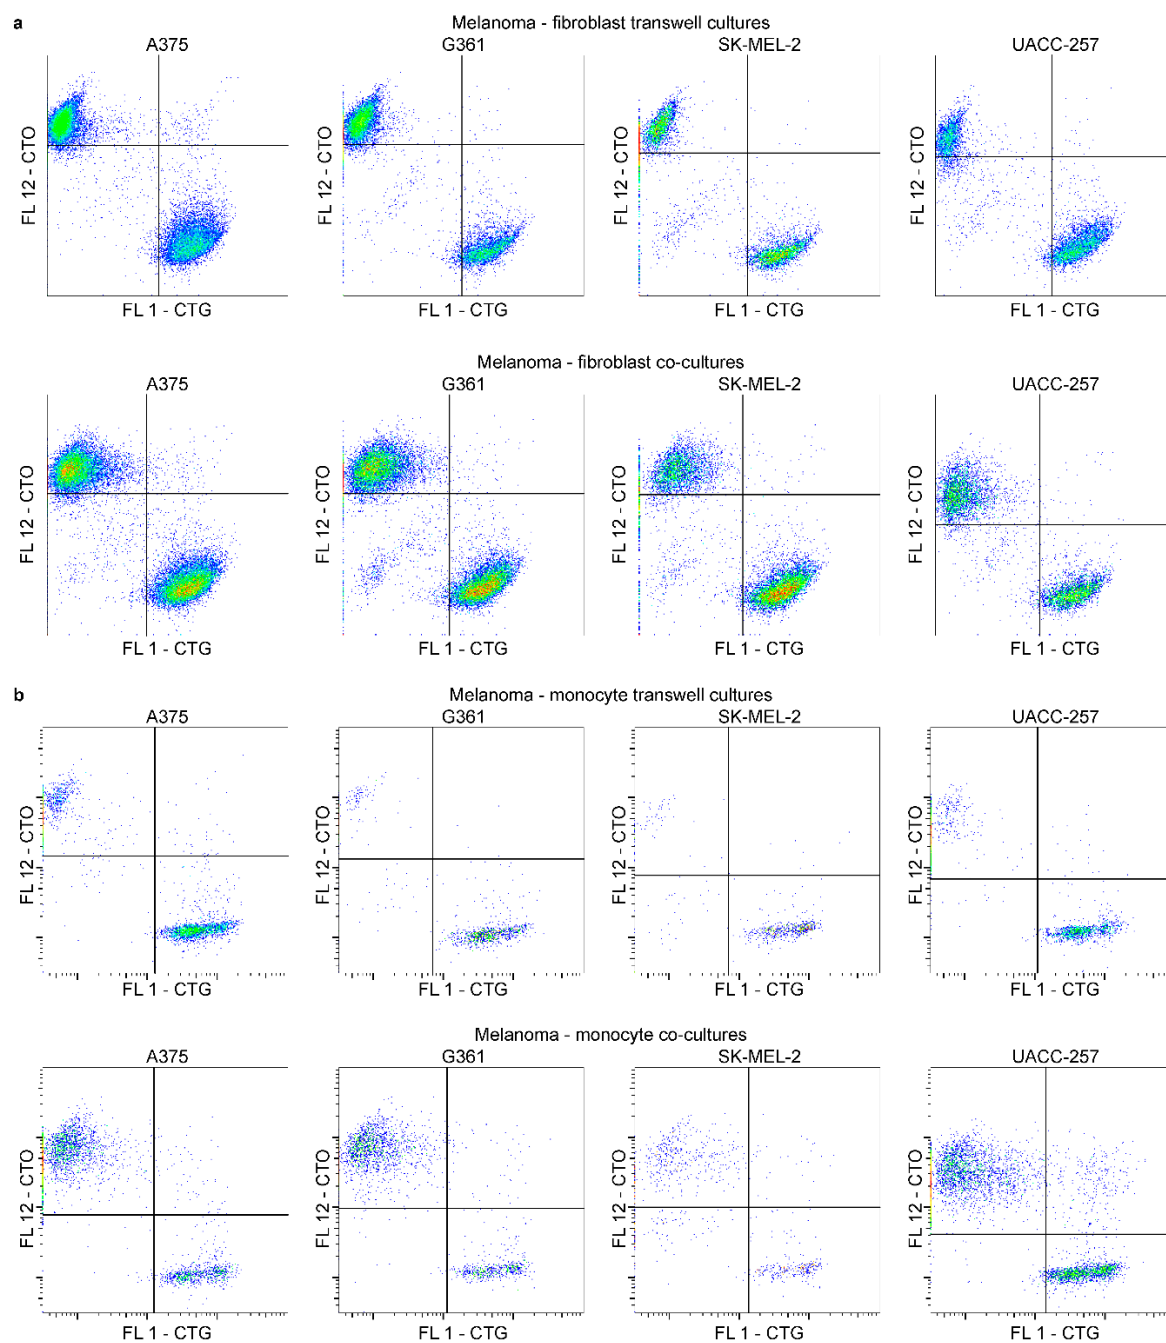

**Figure S2.** All investigated melanoma cell lines fuse spontaneously with human dermal fibroblasts and peripheral blood derived monocytes. **(a,b)** Representative pseudocoloured dot plots of melanoma-fibroblast **(a)** and melanoma-monocyte **(b)** transwell (**upper rows**) and co-cultures (**lower rows**) from three experiments. Since the different cells could only fuse in co-cultures but not in transwell cultures, fusion rate was determined as the rate of double positive cells detected in transwell cultures subtracted from that of co-cultures.

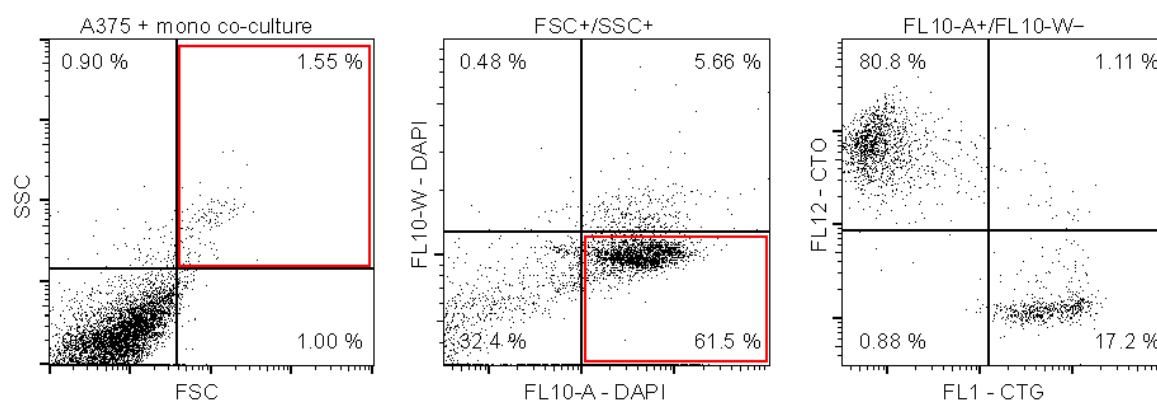

**Figure S3.** Gating mechanisms in flow cytometry for the measurement of cell fusion rates. Representative dot plots of an A375-mono culture. In the forward scatter (FSC)–side scatter (SSC) plot (**left panel**) cell debris is excluded upon gating the events in the upper right quadrant. In the FL10-A–FL10-W plot (**middle panel**) only the FSC + /SSC + events are displayed. FL10-A – cells are considered as apoptotic cells while FL10-W + cells as cell doublets and are therefore excluded. Only FL10-A + /FL10-W – cells are displayed in the CellTracker Green (CTG)–CellTracker Orange (CTO) plot (**right panel**), in which CTG + /CTO – cells are monocytes and CTG – /CTO + cells are melanoma cells.
